# Supplementary material for: Treponema pallidum (syphilis) antigen TpF1 induces angiogenesis through the activation of the IL-8 pathway
Source: PubMed Central journal article supplement (PMC4700457; doi:10.1038/srep18785), 2016-01-05
Supplement: srep18785-s1.pdf [file srep18785-s1.pdf]

## **Supplementary material**

# ***Treponema pallidum* (syphilis) antigen TpF1 induces angiogenesis through the activation of the IL-8 pathway**

**Running title:** TpF1 stimulates angiogenesis

Tommaso Pozzobon<sup>1#</sup>, Nicola Facchinello<sup>1#</sup>, Fleur Bossi<sup>2#</sup>, Nagaja Capitani<sup>3,4</sup>, Marisa Benagiano<sup>4</sup>, Giulietta Di Benedetto<sup>5,6</sup>, Cristina Zennaro<sup>2</sup>, Nicole West<sup>2</sup>, Gaia Codolo<sup>1</sup>, Marialina Bernardini<sup>7</sup>, Cosima Tatiana Baldari<sup>3</sup>, Mario Milco D'Elios<sup>4</sup>, Luca Pellegrini<sup>8</sup>, Francesco Argenton<sup>1\*</sup>, Marina de Bernard<sup>1\*</sup>

<sup>1</sup> Department of Biology, University of Padua, Padua, Italy

<sup>2</sup> Department of Medicine, Surgery and Health Sciences, University of Trieste, Trieste, Italy

<sup>3</sup> Department of Life Sciences, University of Siena, Siena, Italy

<sup>4</sup> Department of Experimental and Clinical Medicine, University of Florence, Florence, Italy

<sup>5</sup> Institute of Neuroscience, Italian National Research Council (CNR), Padua, Italy

<sup>6</sup> Venetian Institute of Molecular Medicine, Padua, Italy

<sup>7</sup> Department of Biology and Biotechnology, Sapienza University of Rome, Rome, Italy

<sup>8</sup> Department of Molecular Biology, Medical Biochemistry and Pathology, Université Laval, Quebec, Canada

# T. Pozzobon, N. Facchinello and F. Bossi equally contributed to this paper

### **\*Corresponding authors**

Francesco Argenton, [francesco.argenton@unipd.it](mailto:francesco.argenton@unipd.it)

Marina de Bernard, [marina.debernard@unipd.it](mailto:marina.debernard@unipd.it)

## Supplementary Figures

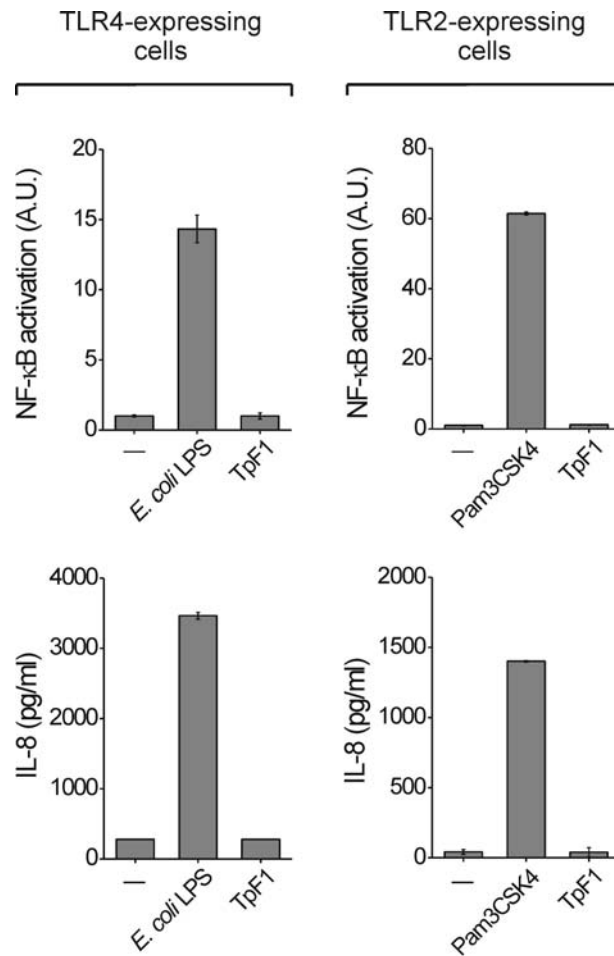

**Figure S1. TpF1 preparations are free from Gram-negative and Gram-positive contaminants.** HEK-293 cells expressing human Toll-Like-Receptor 4 (hTLR4)/MD2/CD14 and HEK-293 cells expressing human Toll-Like-Receptor 2 (hTLR2) were challenged with TpF1 (100 ng/ml) and, as positive controls, with *E. coli* LPS (100 ng/ml) and Pam3CSK4 (1  $\mu$ g/ml). After 4 h (hTLR4) and 6 h (hTLR2), NF- $\kappa$ B activation was measured using the luciferase reporter assay system, and normalized to that of non-stimulated cells. Luciferase activity values from unstimulated cells were set at 1 arbitrary unit (A.U.). IL-8 production was quantified after 18 h stimulation with the specified agonists. Data are the mean values obtained from three independent experiments repeated twice.

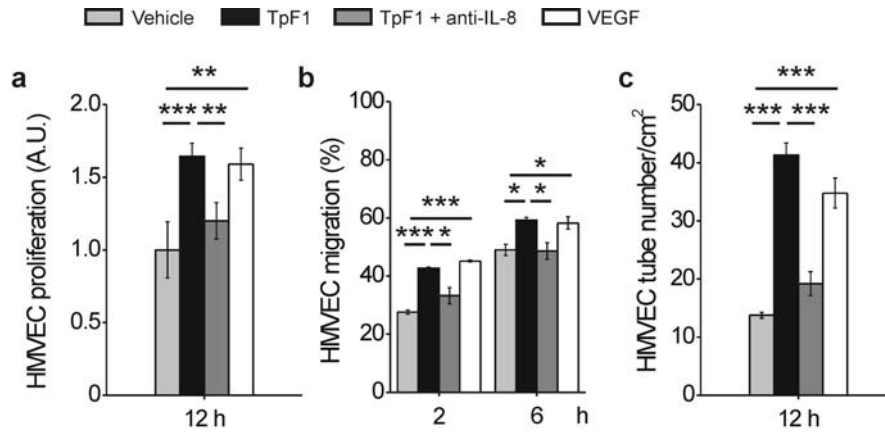

**Figure S2. TpF1 induces IL-8-dependent proliferation and migration of dermal microvascular endothelial cells and their organization in microcapillary-like structures.** (a) HMVEC-D were exposed to TpF1 (in the presence or absence of anti-IL-8 blocking antibody), VEGF or vehicle. After 12 h, cells were counted and normalized to the number of plated cells set as 1 arbitrary unit (A.U.). The graph shows cell proliferation under the different conditions. Data are represented as the mean  $\pm$  S.D. of three independent experiments. (b) HMVEC-D, grown to confluence in 6-well plates, were exposed to TpF1 for 24 h. Supernatants were collected and incubated or not with anti-IL-8 blocking antibody for 45 min, before transferring to the lower chamber of 24 Transwell plates with Fast DiI-labelled HMVEC-D seeded on the upper chamber. VEGF and vehicle added to the lower chamber were used as positive and negative control, respectively. Migrated cells were quantified after 2 and 6 h. Data are represented as the mean  $\pm$  S.D. of three independent experiments. (c) HMVEC-D were seeded on Matrigel-coated coverslips and exposed to TpF1 (in the presence or absence of anti-IL-8 blocking antibody), VEGF or vehicle, for 12 h. Cells were stained with Phalloidin-Alexa Fluor 546 and analyzed by confocal microscope. The number of tubes formed was counted and expressed as number of tubes/cm<sup>2</sup>.
